# Supplementary material for: Adipose tissue glycogen accumulation is associated with obesity-linked inflammation in humans
Source: PubMed Central journal article supplement — Mol Metab. 2015 Oct 16;5(1):5–18. doi: 10.1016/j.molmet.2015.10.001 (PMC4703799; doi:10.1016/j.molmet.2015.10.001), 2015-10-16
Supplement: mmc2.pdf [file mmc2.pdf]

## Supplementary Figure 1

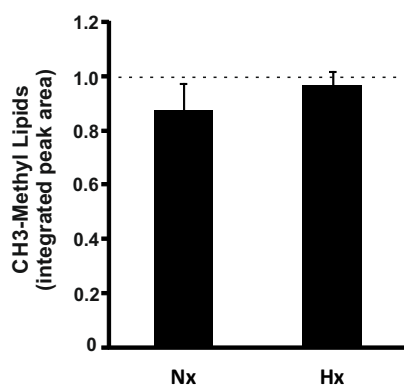

**Figure S1.** NMR analysis of lipid extracts revealed similar incorporation of [ $^{13}\text{C}$ ] in normoxia (Nx) and hypoxia (Hx). Quantification of CH3-methyl lipids was calculated as: Peak area/number of cells \*  $10^5$ .

## Supplementary Figure 2

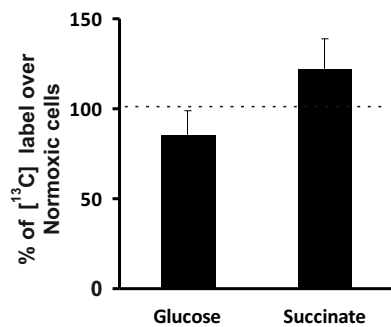

**Figure S2.** Mass Spectrometry metabolic profiling of aqueous extracts revealed no differences in the percentage of [<sup>13</sup>C]-labeled metabolites in normoxia (Nx) and hypoxia (Hx).

### Supplementary Figure 3

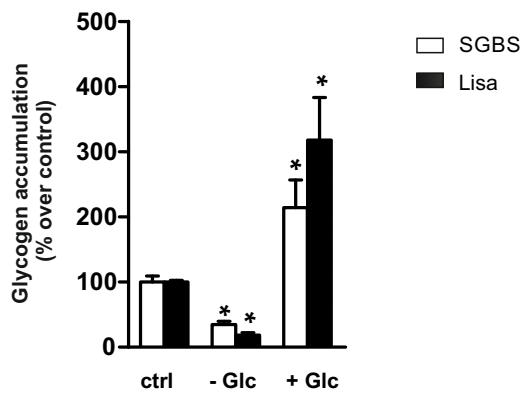

**Figure S3. Glycogen content is dynamically regulated in human adipocytes.** Fully differentiated SGBS and Lisa-2 adipocytes were cultured in the presence (ctrl) or in the absence of glucose (-Glc), following 24 hour-incubation with 20mM glucose and 10 nM ins (+Glc) for 24 hours, and glycogen content was determined.

## Supplementary Figure 4

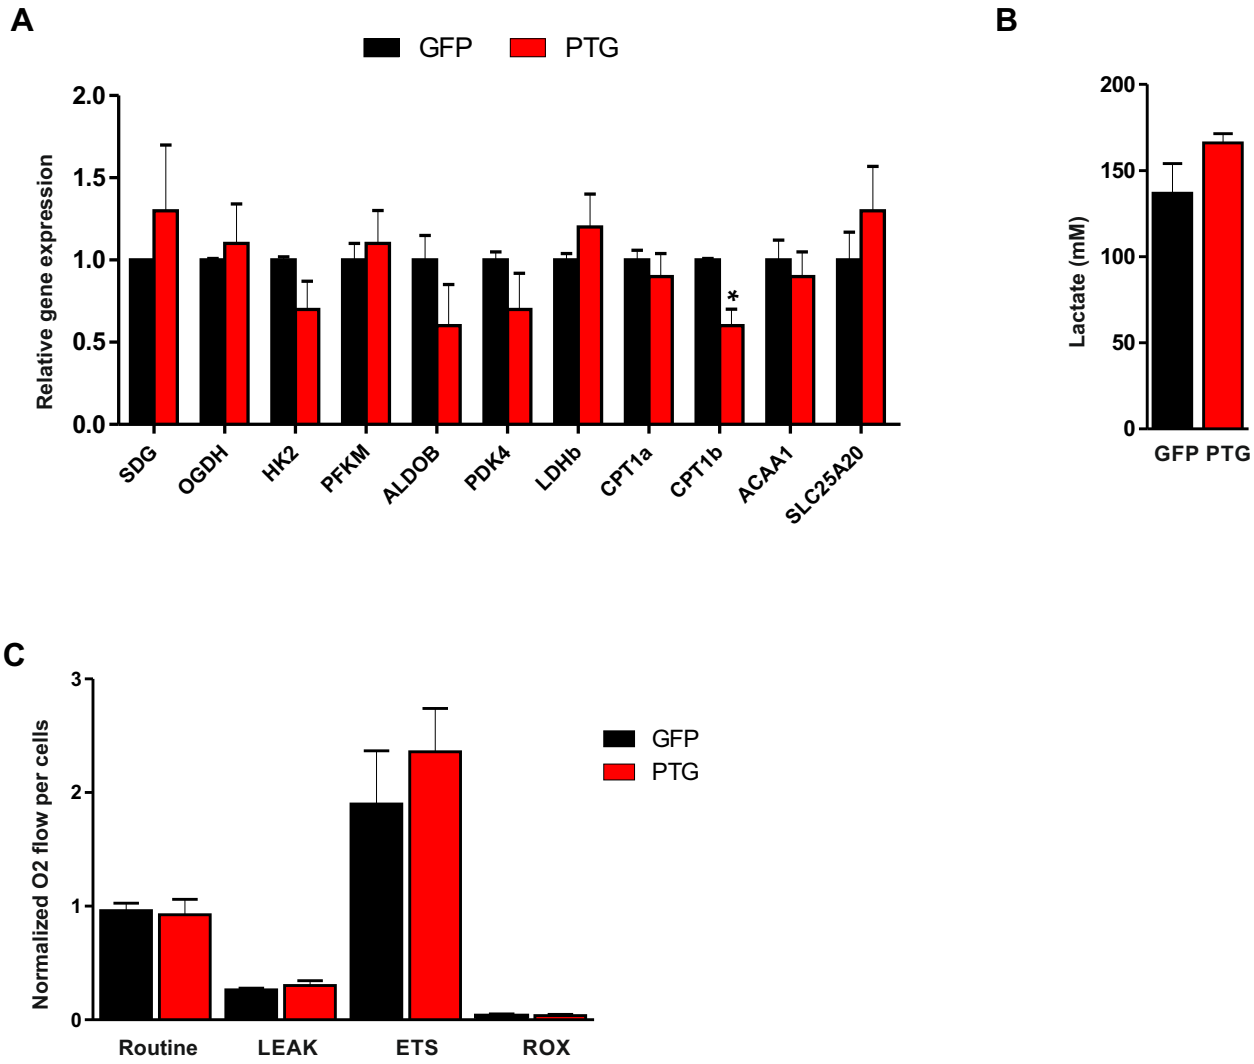

**Figure S4. PTG overexpression does not impact mitochondria.** Differentiated SGBS cells were transduced with Ad-GFP or Ad-PTG and (A) Cell extracts were subjected to gene expression analysis with a range of metabolic markers (n=4). Data are expressed as mean  $\pm$  SEM. \*p < 0.05. (B) Lactate concentration was measured from the conditioned medium of SGBS infected cells (n=3). (C) High-resolution mitochondrial respirometry (n=8).

## Supplementary Figure 5

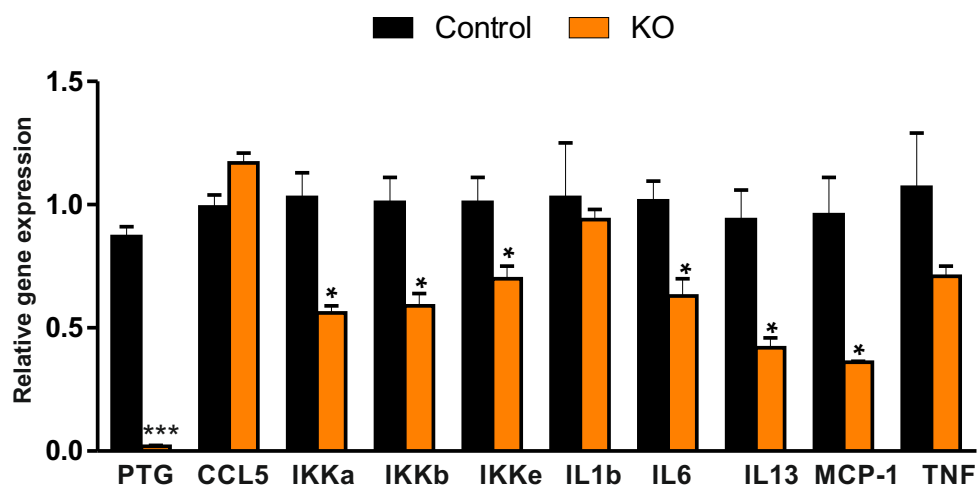

**Figure S5. PTG deletion alters inflammatory gene expression profile in adipose tissue.** Genes expression analysis of inflammatory markers from 12-weeks-old male control (n=3) and PTG-KO (n=3) mice. Data are expressed as mean±SEM. \* p<0.05; \*\*\*p<0.001.

## Supplementary Figure 6

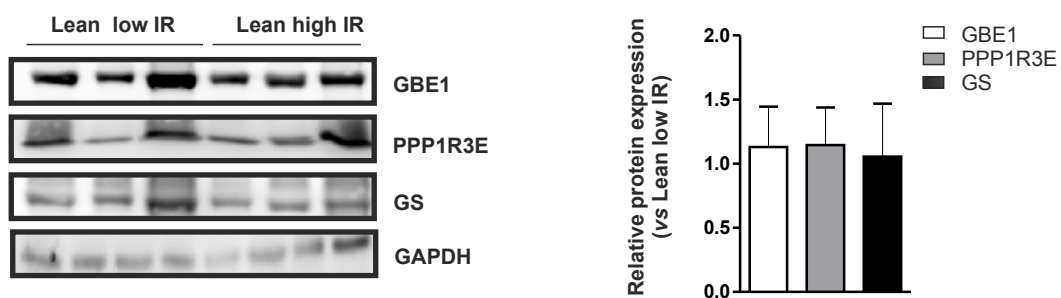

**Figure S6. Insulin sensitivity in lean patients is not associated with changes in glycogen-related gene expression.** Representative immunoblotting of GBE1, PPP1R3E and GS protein in SAT from lean patients classified according to insulin resistance assessed by HOMA-IR. GAPDH was used as a loading control. Quantification is shown (n=3).

## Supplementary Figure 7

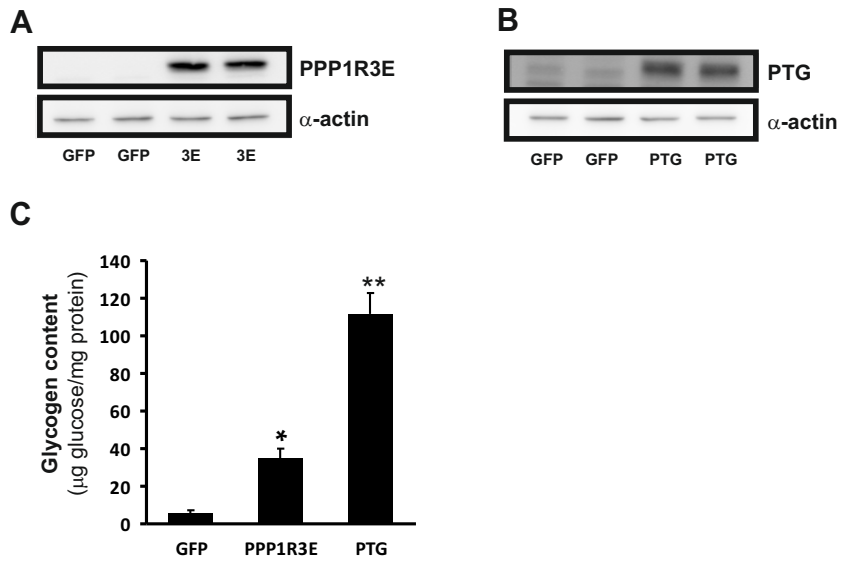

**Figure S7. PPP1R3E and PTG overexpression.** SGBS cells were transduced with Ad-GFP, Ad-3E or Ad-PTG, followed by incubated in medium with 25mM glucose for 24h. Western blot analysis on total cell extracts hybridized with antibodies against (A) PPP1R3E or (B) PTG.  $\alpha$ -Actin was used as loading control. (C) Glycogen content was assessed from two experiments performed in triplicate. Mean $\pm$ SEM. \* $p < 0.001$ ; \*\*  $p < 0.0001$ .
